# Supplementary material for: Transfer of CO2, N2O and CH4 to butyl rubber (polyisobutylene) septa during storage
Source: Royal Society of Chemistry journal article supplement (doi:10.1039/b719729b), 2008-01-01
Supplement: b719729b.pdf [file b719729b.pdf]

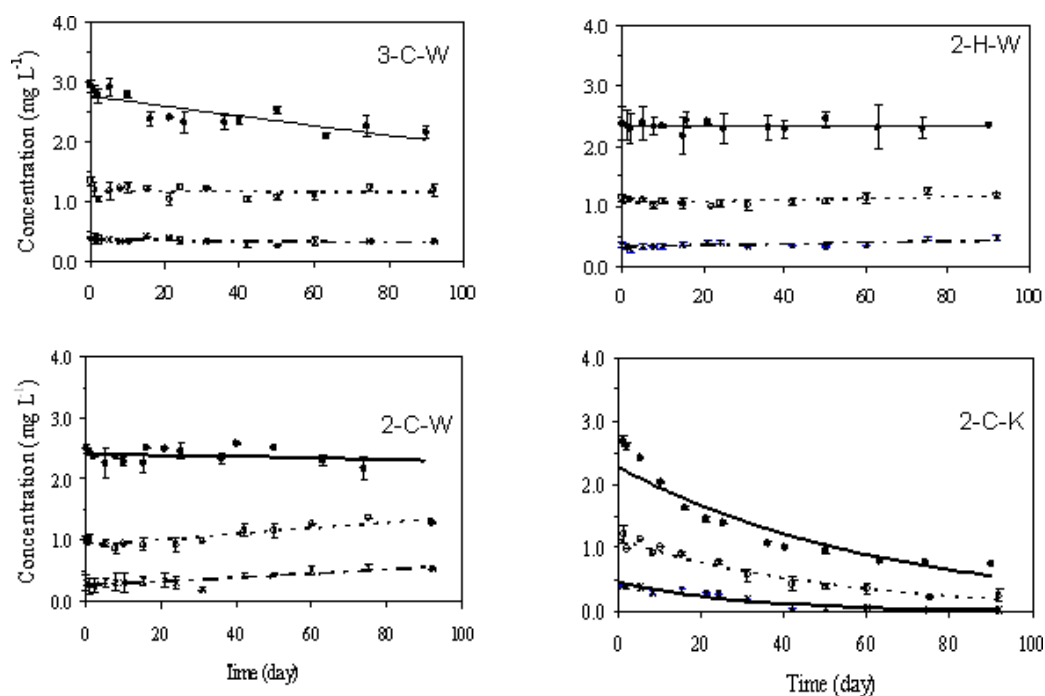

Figure 1. CO<sub>2</sub> concentration (mg L<sup>-1</sup>) as a function of time (day) for four types of septa and for three initial applied concentrations (0.33, 1.14, and 2.45 mg L<sup>-1</sup>). Error bars indicate standard deviation.

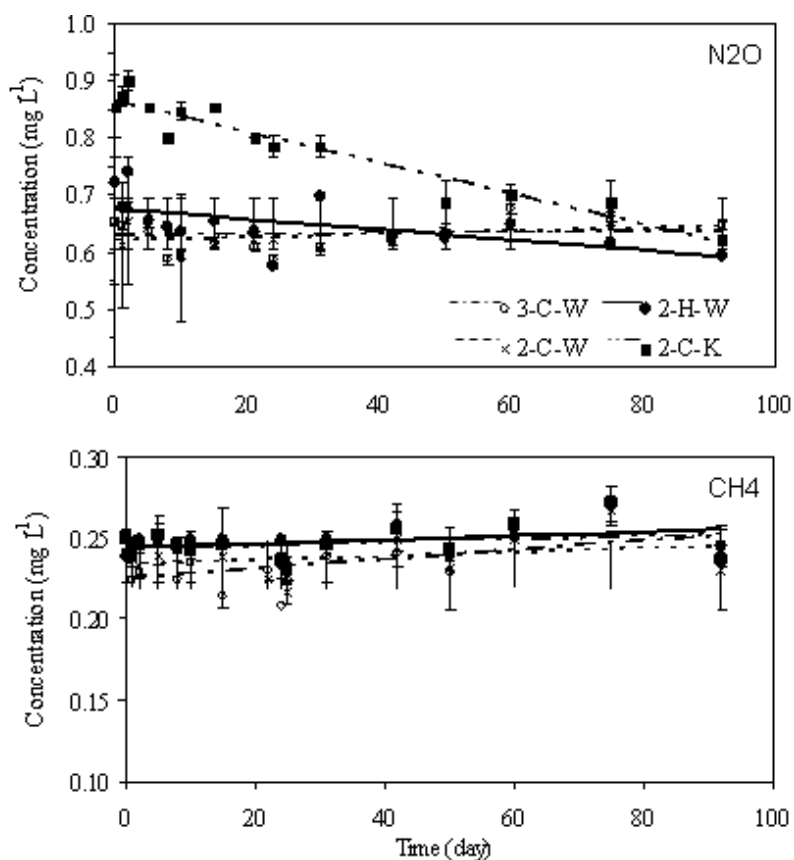

Figure 2. N<sub>2</sub>O and CH<sub>4</sub> concentration (mg L<sup>-1</sup>) as a function of time (day) for four types of septa. Error bars indicate standard deviation.
